# Supplementary material
Source: publisher figshare collection journal article supplement (https://frontiersin.figshare.com/ndownloader/files/26201321)
Supplement: Supplementary file [file 26201321]

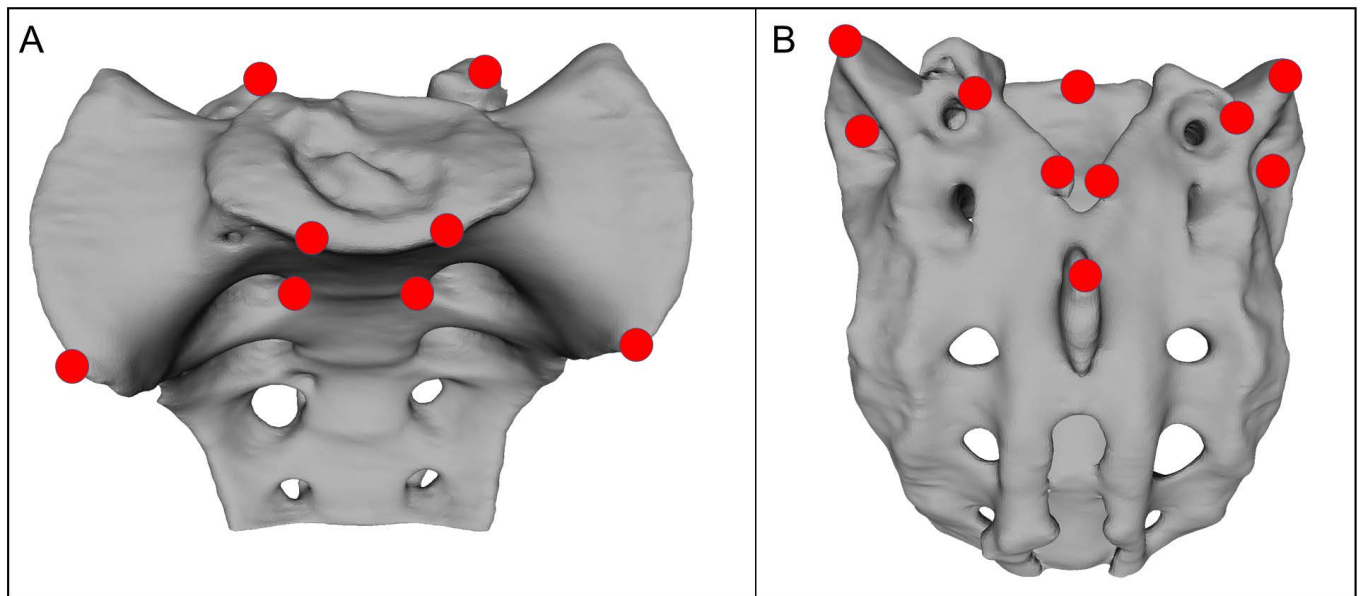

**Supplementary Figure 2.** Control points selection for rigid surface registration. Eight control points from the superior-ventral (**A**) region and ten control points from the superior-dorsal (**B**) region were selected from the reference (patient QCT) and from the aligned geometry (physical model CT scan) respectively. The red circles represent the registration points selection areas.
